# Supplementary material for: Simple design but marvelous performances: molecular gels of superior strength and self-healing properties
Source: Royal Society of Chemistry journal article supplement (doi:10.1039/c2sm27208c), 2012-11-19
Supplement: c2sm27208c.pdf [file c2sm27208c.pdf]

# Simple Design but Marvelous Performances: Molecular Gels of Superior Strength and Self-healing Properties

Zhiyan Xu, Junxia Peng, Ni Yan, Hang Yu, Shasha Zhang, Kaiqiang Liu, Yu Fang\*

Key Laboratory of Applied Surface and Colloid Chemistry of Ministry of Education, School of Chemistry and Chemical Engineering, Shaanxi Normal University, Xi'an, 710062, P. R. China

## 1. Gelation behaviors of the compounds

**Table S1** Gelation behaviors of compounds **1**, **2**, **3** and **4** in different solvents (2.5%, w/v).

| solvents           | <b>1</b> | <b>2</b> | <b>3</b> | <b>4</b> | solvents                        | <b>1</b> | <b>2</b> | <b>3</b> | <b>4</b> |
|--------------------|----------|----------|----------|----------|---------------------------------|----------|----------|----------|----------|
| methanol           | P        | P        | P        | P        | kerosene                        | PG*      | PG*      | I        | P        |
| ethanol            | PG*      | P        | P        | P        | ethyl ether                     | I        | I        | I        | I        |
| <i>n</i> -propanol | G        | P        | P        | P        | petroleum ether                 | PG*      | G*       | I        | I        |
| <i>n</i> -butanol  | G        | P        | P        | P        | benzene                         | G        | P        | P        | S        |
| <i>n</i> -pentanol | PG*      | P        | P        | S        | toluene                         | G        | P        | P        | G*       |
| <i>n</i> -hexanol  | PG*      | P        | S        | S        | acetic acid                     | I        | P        | P        | P        |
| <i>n</i> -heptanol | PG*      | P        | S        | S        | acetonitrile                    | I        | P        | P        | P        |
| <i>n</i> -octanol  | PG*      | P        | S        | S        | TEA                             | PG*      | I        | I        | VS       |
| <i>n</i> -decanol  | G        | P        | S        | S        | DMSO                            | P        | G        | G        | S        |
| H <sub>2</sub> O   | I        | I        | I        | I        | DMF                             | S        | S        | G        | P        |
| <i>n</i> -pentane  | I        | I        | I        | G*       | THF                             | S        | S        | S        | S        |
| <i>n</i> -hexane   | G*       | G*       | I        | G*       | acetone                         | G        | P        | S        | S        |
| <i>n</i> -heptane  | G*       | G*       | I        | I        | ethyl acetate                   | G        | P        | S        | S        |
| <i>n</i> -octane   | PG*      | PG*      | I        | I        | pyridine                        | S        | S        | S        | S        |
| <i>n</i> -nonane   | PG*      | PG*      | I        | I        | CH <sub>2</sub> Cl <sub>2</sub> | P        | P        | S        | S        |
| <i>n</i> -decane   | I        | I        | I        | PG*      | CHCl <sub>3</sub>               | P        | S        | S        | S        |
| cyclohexane        | PG*      | I        | I        | PG*      | CCl <sub>4</sub>                | I        | P        | VS       | G        |

G = Gel; PG = Partial gel; S = Solution; P = Precipitation; I = Insoluble; VS = Viscous solution.

G\* = Gels formed after sonication.

## 2. Rheological Studies

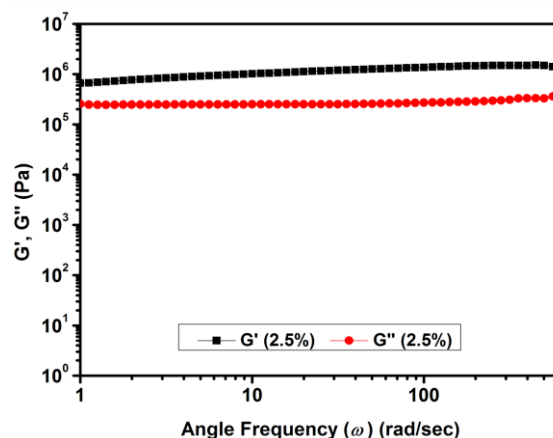

**Fig. S1** Evolution of  $G'$  and  $G''$  as functions of the angle frequency. The applied shear stress is equal to 4 000 Pa. The sample is a gel of **1** in pyridine/methanol ( $v:v=4:6$ , 2.5%, w/v).

### 3. XRD Studies

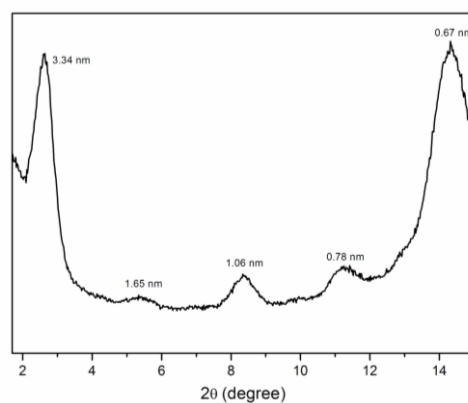

**Fig. S2** XRD profile of **1**/pyridine-methanol ( $v:v=4:6$ ) recorded at room temperature.

### 4. Self-healing Behavior

Video
